# Supplementary material
Source: publisher figshare collection journal article supplement (https://karger.figshare.com/ndownloader/files/14413454)
Supplement: Supplementary file 1 [file 14413454]

**Supplemental Figure 1 (Figure S1): Mutations in *PKD1* truncating group patients.**

NCBI reference sequences were used: *PKD1, NM_001009944.2*

**
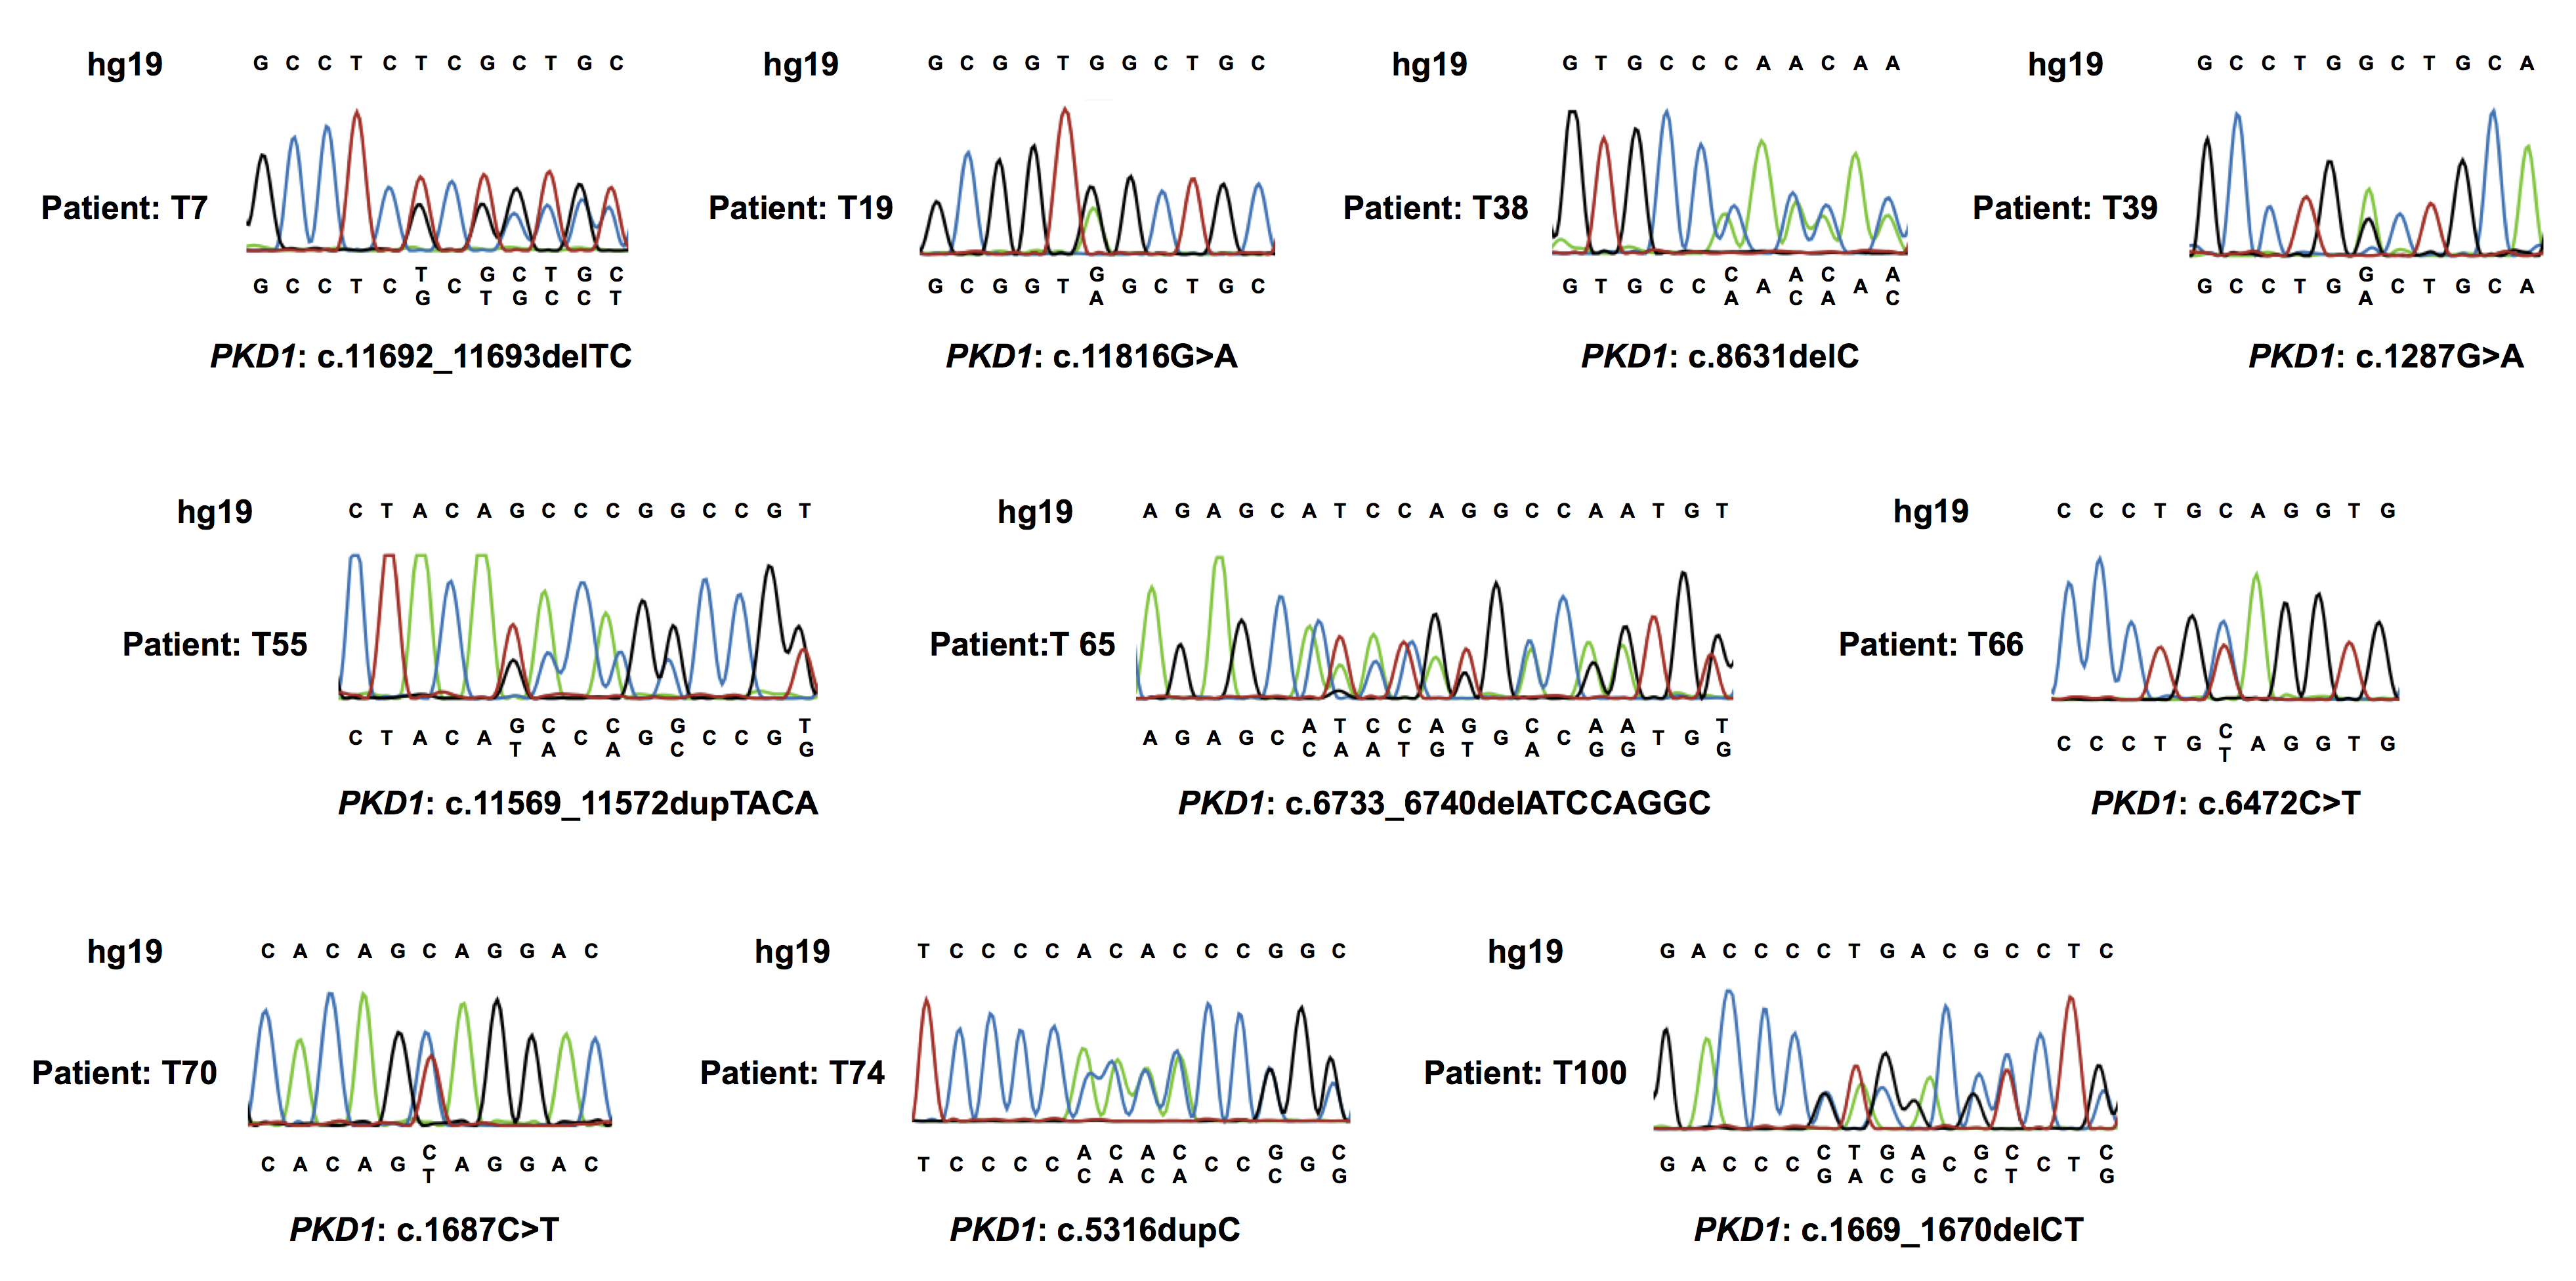
**
